# Supplementary material
Source: PubMed Central journal article supplement (PMC2770753)
Supplement: 00327.2009_1.pdf [file 00327.2009_1.pdf]

**Supplementary Table 1: Differential Blood Cell Counts in Mice Treated for Ten Weeks (1h/day, 3 days/week) with Inhaled CO ( mean ± SE)**

| <b>Treatment</b>     | <b>Control</b>           |                             | <b>25 PPM</b>            |                             | <b>250 PPM</b>           |                             |
|----------------------|--------------------------|-----------------------------|--------------------------|-----------------------------|--------------------------|-----------------------------|
| <b>Strain Number</b> | <b>C57BL/6J<br/>n=11</b> | <b>S+S Antilles<br/>n=8</b> | <b>C57BL/6J<br/>n=12</b> | <b>S+S Antilles<br/>n=8</b> | <b>C57BL/6J<br/>n=12</b> | <b>S+S Antilles<br/>n=8</b> |
| <b>WBC (1000/μL)</b> | 9.47±0.72                | 19.19±1.29                  | 8.3±0.73                 | 14.85±0.95                  | 8.97±0.93                | 12.8±1.30                   |
| <b>NE (1000/μL)</b>  | 1.04±0.10                | 5.57±0.50                   | 1.24±0.12                | 4.56±0.34                   | 1.85±0.47                | 3.66±0.57                   |
| <b>LY (1000/μL)</b>  | 7.52±0.59                | 12.23±0.89                  | 6.55±0.60                | 8.98±0.62                   | 6.99±0.71                | 7.28±1.23                   |
| <b>MO (1000/μL)</b>  | 0.74±0.07                | 1.01±0.13                   | 0.34±0.03                | 0.87±0.14                   | 0.36±0.03                | 0.69±0.19                   |
| <b>EO (1000/μL)</b>  | 0.14±0.03                | 0.35±0.04                   | 0.14±0.02                | 0.34±0.07                   | 0.23±0.05                | 0.95±0.51                   |
| <b>BA (1000/μL)</b>  | 0.03±0.01                | 0.08±0.02                   | 0.02±0.00                | 0.10±0.04                   | 0.04±0.01                | 0.23±0.11                   |

1  
2

| <b>Supplementary Table 2: Weekly White Blood Cell Counts ( mean <math>\pm</math> SE) in S+S-Antilles Mice Treated with Inhaled CO for 1h/day, 3 days/week</b> |                  |                                     |
|---------------------------------------------------------------------------------------------------------------------------------------------------------------|------------------|-------------------------------------|
| <b>Week</b>                                                                                                                                                   | <b>Treatment</b> | <b>WBC (1000/<math>\mu</math>L)</b> |
| <b>0</b>                                                                                                                                                      | No               | 15.1 $\pm$ 1.24                     |
| <b>1</b>                                                                                                                                                      | Yes              | 16.8 $\pm$ 2.31                     |
| <b>2</b>                                                                                                                                                      | Yes              | 16.0 $\pm$ 1.38                     |
| <b>3</b>                                                                                                                                                      | Yes              | 14.9 $\pm$ 1.86                     |
| <b>4</b>                                                                                                                                                      | Yes              | 16.23 $\pm$ 1.06                    |
| <b>5</b>                                                                                                                                                      | Yes              | 16.22 $\pm$ 1.46                    |
| <b>6</b>                                                                                                                                                      | Yes              | 13.77 $\pm$ 1.97                    |
| <b>7</b>                                                                                                                                                      | Yes              | 11.43 $\pm$ 0.31                    |
| <b>8</b>                                                                                                                                                      | Yes              | 11.25 $\pm$ 1.16                    |
| <b>9</b>                                                                                                                                                      | No               | 10.03 $\pm$ 0.61                    |
| <b>10</b>                                                                                                                                                     | No               | 8.23 $\pm$ 0.84                     |
| <b>11</b>                                                                                                                                                     | No               | 9.77 $\pm$ 0.61                     |
| <b>12</b>                                                                                                                                                     | No               | 10.05 $\pm$ 0.69                    |
| <b>13</b>                                                                                                                                                     | No               | 11.26 $\pm$ 0.67                    |
| <b>14</b>                                                                                                                                                     | No               | 13.13 $\pm$ 0.87                    |

3
